# Supplementary material
Source: PubMed Central journal article supplement (PMC8753455)
Supplement: mmc1.pdf [file mmc1.pdf]

YMTHE, Volume 30

## **Supplemental Information**

### **Ginseng-derived nanoparticles potentiate immune checkpoint antibody efficacy by reprogramming the cold tumor microenvironment**

**Xuan Han, Qin Wei, Yan Lv, Ling Weng, Haoying Huang, Qingyun Wei, Mengyuan Li, Yujie Mao, Di Hua, Xueting Cai, Meng Cao, and Peng Cao**

## 1 **Supplementary Materials and Methods**

### 2 **Mice, cell lines and ethics statement**

3 Male and female 6-week-old BALB/c mice and C57BL6 mice were purchased from the  
4 Comparative Medicine Centre, Yangzhou University (Yangzhou, Jiangsu, China). All  
5 mice received access to food and water *ad libitum* and were housed in a temperature-  
6 controlled colony room with a 12/12-hour dark/light cycle. All animal experimental  
7 protocols were approved by the Institutional Animal Care and Use Committee of  
8 Nanjing University of Chinese Medicine.

9 The murine melanoma cell line B16-F10, murine colon cancer cell line CT26,  
10 murine luciferase expressed breast cancer cell line 4T1-Luc, and murine colon cancer  
11 cell line MC38 were purchased from the Institute of Biochemistry and Cell Biology,  
12 Academy of Science (Shanghai, China). Cells were cultured in Dulbecco's modified  
13 Eagle medium (DMEM) or Roswell Park Memorial Institute (RPMI) 1640,  
14 supplemented with 10% fetal bovine serum, 100 U/mL penicillin, and 100 mg/mL  
15 streptomycin (all from Thermo Fisher Scientific, USA). All cells were incubated at  
16 37 °C in a humidified atmosphere with 5% CO<sub>2</sub>.

### 17 **Patient samples**

18 Our study was conducted and archived colorectal carcinoma specimens ( $n = 52$ ,  
19 2020LWKYZ052) were collected according to the protocol of a human research ethics  
20 committee at Affiliated Hospital of Integrated Traditional Chinese and Western

21 Medicine (Nanjing, China) with patient's written formal consent. These patients have  
22 been followed over time.

### 23 **Study design**

24 This study was designed to characterize the efficiency of GDNPs combined with PD-1  
25 mAb by analyzing samples from mice with tumors. Three murine tumor models (CT26,  
26 4T1-luc, MC38) were selected to evaluate the combinatorial treatment efficiency. Six-  
27 week-old male mice were inoculated subcutaneously with  $3 \times 10^5$  cells in the right  
28 upper flank ( $n = 8$  per group, day 0). The first treatment was scheduled until the tumor  
29 was around 50 - 100 mm<sup>3</sup> on day 8. The control group received IgG (200 µg/100  
30 µL/mouse/*i.p.*, clone 2AE, Bio X Cell, Lebanon, USA). PD-1 mAb (200 µg/100  
31 µL/mouse/*i.p.*, clone BE0146, Bio X Cell, Lebanon, USA), GDNPs (200 µg/100  
32 µL/mouse/*i.p.*) were injected intraperitoneally on day 8, 11, 14, 17 and 20 as [Figure 2A](#)  
33 demonstrated. The tumors were measured every other day with a caliper and the volume  
34 was calculated ( $\text{length} \times \text{width}^2/2$ ). Mice with no visible and touchable tumors on  
35 consecutive days were considered to have complementally regressed tumors. Mice were  
36 sacrificed when tumor volume was over 2000 mm<sup>3</sup>. Tumor weight was calculated using  
37 an electronic weighing machine.

38 The rechallenge study: To evaluate whether Combo treatment exerted specific and  
39 long-term therapeutic effects, we performed a rechallenge assay. Mice were re-  
40 challenged with  $3 \times 10^5$  CT26 murine colon cancer cells in the right lower flank or  $2 \times$   
41  $10^5$  4T1 murine breast cancer cells inoculated in the left breast fat pad in the left lower

42 flank without any subsequent treatment (on day 85 since the original tumor implanted  
43 in the Combo group or healthy mice of the same age) (Figure 5B). Thereafter, tumor  
44 volume was recorded continuously for 17 days.

45 The 4T1 murine breast cancer lung metastasis study: Six-to-eight-week-old female  
46 BALB/c mice were inoculated with  $2 \times 10^5$  4T1 murine breast cancer cells in the right  
47 lower breast pad on day 0. On day 5,  $1 \times 10^5$  4T1-luc murine breast cancer cells were  
48 intravenously injected to mimic the breast cancer lung metastasis. The treatment was  
49 started when the tumor volume in breast pad was around 50-100 mm<sup>3</sup>. The luciferase  
50 images were taken on days 13, 16, and 19. The intensity of luciferin signal in mouse  
51 chest were measured using IVIS Series *In Vivo* Imaging Systems (PerkinElmer, USA).  
52 Mice were sacrificed on day 20 and their lungs were harvested and stored in Bouin's  
53 buffer (RS 4140, G-CLONE).

54 CD4<sup>+</sup>/CD8<sup>+</sup> T lymphocyte or macrophage depletion assay: Six-week-old male  
55 BALB/c mice were inoculated with  $3 \times 10^5$  CT26 murine colon cancer cells in the right  
56 upper flank on day 0. CD8<sup>+</sup> T, CD4<sup>+</sup> T, or macrophage depletion was performed by  
57 intraperitoneally injecting with anti-mouse CD8A (200 µg/100 µL/mouse/*i.p.*; clone 53-  
58 6.7; rat IgG2a; Bio X Cell)/ Isotype control (200 µg/100 µL/mouse/*i.p.*; clone 2A3; rat  
59 IgG2a; Bio X Cell) or CD4 (200 µg/100 µL/mouse/*i.p.*; clone YTS191; rat IgG2b; Bio  
60 X Cell)/ Isotype control (200 µg/100 µL/mouse/*i.p.*; clone LTF-2; Rat IgG 2b; Bio X  
61 Cell) or clodronate liposome (1 mg/200 µL/mouse/*i.p.*; Yeasen)/PBS liposome (1  
62 mg/200 µL /mouse/*i.p.*; Yeasen) twice a week before Combo treatment began. PD-1

63 mAb (200 µg/100 µL/mouse/*i.p.*, clone BE0146, Bio X Cell) and GDNPs (200 µg/100  
64 µL/mouse/*i.p.*) were administered every two days from day 8 for 5 times in total. Mice  
65 were sacrificed on day 21 and the tumor weight was calculated by an electronic  
66 weighing machine.

67 CCL5 and CXCL9 *in vivo* neutralization assay: Six-week-old male BALB/c mice  
68 were inoculated with  $3 \times 10^5$  CT26 murine colon cancer cells in the right upper flank  
69 on day 0. CD8<sup>+</sup> T, CD4<sup>+</sup> T, or macrophage depletion was performed by intraperitoneally  
70 injecting with anti-mouse CCL5 (50 µg/100 µL/mouse/*i.p.*; clone 53405; rat IgG2a;  
71 R&D)/Isotype control (50 µg/100 µL/mouse/*i.p.*; Catalog: MAB006; rat IgG2a; R&D)  
72 or anti-mouse CXCL9 (100 µg/100 µL/mouse/*i.p.*; clone MIG-2F5.5; Armenian  
73 Hamster IgG κ; Bio X Cell)/ Isotype control (100 µg/100 µL/mouse/*i.p.*; Catalog:  
74 BE0091; Armenian Hamster IgG; Bio X Cell) twice a week after Combo treatment  
75 began. PD-1 mAb (200 µg/100 µL/mouse/*i.p.*, clone BE0146, Bio X Cell) and GDNPs  
76 (200 µg/100 µL/mouse/*i.p.*) were administered every two days from day 8 for 5 times  
77 in total. Mice were sacrificed on day 21 and the tumor weight was calculated by an  
78 electronic weighing machine.

### 79 **GDNPs preparation**

80 GDNPs were isolated from fresh *Panax ginseng* C. A. Mey root and prepared as  
81 previously published protocol.<sup>21</sup> The Bicinchoninic Acid Kit (Beyotime, China) was  
82 used to better quantify the GDNPs concentration. GDNPs measurement were  
83 performed using Nanoparticle Tracking Analyses NS3000 with NanoSight software.

84 For Transmission electron microscope image, 10  $\mu$ L purified GDNPs was deposited  
85 onto the surface of formvar-coated copper grids, followed by incubation with 1% uranyl  
86 acetate for 15s. The samples were left to dry at room temperature and observed using a  
87 HITACHI H-7650 electron microscope operated at 80 kV at a magnification of 20,000 $\times$ .  
88 A sensitive LC-MS method has been developed for determination of Ginsenoside Re in  
89 GDNPs. For quantitative analysis, the separation of the multi-components was carried  
90 out by using the Waters Quattro Micro (series 2695; Waters, USA) liquid  
91 chromatography equipped with a quaternary pump, an online vacuum degasser, an  
92 autosampler, a thermostatic column compartment. All data collected were analyzed and  
93 processed using the Masslynx (Waters, USA). Chromatographic separation was  
94 performed on an Agilent HC-C<sub>18</sub> column (4.6 mm  $\times$  250 mm, 5  $\mu$ m, Agilent, USA)  
95 using gradient elution of acetonitrile-0.1% formic acid in water with a flow rate of 0.4  
96 ml/min. The mass spectrometer was run in electrospray ionization (ESI + ) mode by  
97 using multiple reaction monitoring (MRM).

98 **Flow cytometry analysis of immune cells in the TME, splenocytes and peripheral**  
99 **blood**

100 Immune cells were isolated by using Percoll (17-0891-09. GE Healthcare) from tumor  
101 cell suspension. These cells were incubated with CD16/32 (clone 93, BioLegend) for  
102 15 min on ice and then were stained with various combinations of following  
103 fluorochrome-conjugated antibody at the appropriate dilutions for 30 min on ice,  
104 namely, CD3-APC/Cy7 (clone 145-2C11, BioLegend), CD8a-phycoerythrin (PE; clone

105 53-6.7, BioLegend), CD45-fluorescein isothiocyanate (FITC; clone 30-F11,  
106 BioLegend), CD11b-APC/Cy7 (clone M1/70, BioLegend), F4/80-PE/Cy7 (clone BM8,  
107 BioLegend), F4/80-BV421(clone BM8, BioLegend), CD8a-APC (clone 53-6.7,  
108 BioLegend), CD4-APC (clone GK1.5, BioLegend), CD4-PE/Cy7 (clone GK1.5  
109 BioLegend), FVD506 (eflour 506, Invitrogen), CD45-BV510 (clone 30-F11,  
110 BioLegend), TIM3-PE (clone 5D12, BD Pharmingen), ICOS-PE/Cy7 (clone 7E.17G9,  
111 Invitrogen), PD-1-APC (clone 29F-1A12, BioLegend).

112 For T cell derived anti-tumor cytokines,  $2 \times 10^6$  splenocytes or TILs were incubated  
113 in RPIM 1640 with Cell Stimulation Cocktail Plus Protein Transport Inhibitors (500 $\times$ )  
114 for 6 h. Then cells were stained with surface markers and fixed and permeabilized using  
115 Fixation/Permeabilization kit (00-5123-43, 00-5223-56, Invitrogen), IFN- $\gamma$ -PE/Cy7  
116 (clone XMG1.2 BioLegend), granzyme B-FITC (clone NGZB, BioLegend), TNF- $\alpha$ -  
117 BB700 (clone MP6-XT22, BD Horizon) were diluted in Permeabilization buffer 10 $\times$   
118 (1:20) for 45 min.

119 Stained cells were analysed on a FACS Aria II Flow Cytometer, BD Biosciences)  
120 using BD FACSDiva software (BD Bioscience, USA) and data were processed using  
121 Flowjo Version 10 (BD Bioscience, USA).

## 122 **Milliplex Luminex assay**

123 Milliplex Luminex assay (Merk, Germany) was performed to examine the  
124 concentration of IL-2, IL-12 p40, and IL-12 p70 in mice plasma according to

125 manufacturer's instructions.

### 126 **Reverse transcription PCR assay**

127 Total RNA was isolated from 50,000 cells of M2-BMDM + GDNPs/PBS cultured with  
128 TRIzol reagent (Invitrogen) for 3min. The total RNA was reverse-transcribed using  
129 HiScript III RT SuperMix for qPCR (+gDNA wiper; category number R323-01;  
130 Vazyme Biotech), ChamQ Universal SYBR qPCR Master Mix (category number Q711-  
131 02; Vazyme Biotech). Primers were listed in the Supplemental Materials. Real-time  
132 PCR was performed using a 7500 Real-Time PCR System (Applied Biosystems, USA).

### 133 **RNA-seq analyses**

134 Total RNA of M2-BMDM + GDNPs/PBS was extracted using a TRIzol reagent kit  
135 (Invitrogen, Carlsbad, USA) according to the manufacturer's protocol. The RNA  
136 quality was examined using RNase free agarose gel electrophoresis and processed  
137 using a 2100 Bioanalyzer Instrument (Agilent Technologies, USA). After total RNA  
138 was extracted, eukaryotic mRNA was enriched using Oligo(dT)beads, while  
139 prokaryotic mRNA was enriched by removing rRNA using Ribo-Zero™ Magnetic  
140 Kit (Epicenter, USA). Then, the enriched mRNA was fragmented using fragmentation  
141 buffer and reverse transcribed into cDNA with random primers. The second-strand  
142 cDNA was synthesized using DNA polymerase I, RNase H, dNTP and buffer. Then the  
143 cDNA fragments were purified with a QiaQuick PCR extraction kit (Qiagen,  
144 Netherlands), end repaired, poly(A) added, and ligated to Illumina sequencing adapters.



145 The ligation products were selected by size using agarose gel electrophoresis, PCR  
146 amplified, and sequenced using Illumina HiSeq2500 by Gene Denovo Biotechnology  
147 (Guangzhou, China).

#### 148 **Immunohistochemistry**

149 Fresh organs such as heart, liver, spleen, lung, and kidney were fixed. Hematoxylin-  
150 eosin staining was performed to analyze microscopic pathological changes in murine  
151 main organs under Combo treatment by an optical microscope (Olympus, Japan). Fresh  
152 tumor samples were fixed with 4% paraformaldehyde for several days and embedded  
153 in paraffin, sectioned into 5- $\mu$ m-thick sections and observed using a Leica RM 2235  
154 (Leica, Germany) after being mounted on adhesive glass slides. BSA (Service Bio,  
155 G50001), and CD8 (GB13429, Service, 1:200) were used for staining to evaluate the  
156 infiltration of CTLs in tumors.

#### 157 **Immunofluorescent**

158 For immunofluorescence, BMDMs on the microscope cover glass were fixed in ice-  
159 cold 4% paraformaldehyde. Sections were washed thrice with PBS for 5 min and  
160 mounted using ProLong Gold Antifade Mountant with DAPI (4',6-diamidino-2-  
161 phenylindole; Thermo Fisher Scientific, USA) and imaged using 60 $\times$  magnification  
162 with an Olympus FV10i confocal microscope (Olympus, Japan). The resultant digital  
163 images were analysed using the Olympus FluoView software version 4.0b. Images of  
164 three nonoverlapping optical fields covering the tumor sections surface were captured.

165 Image analysis was performed in ImageJ with the area measurement application or  
166 manual counting.

167 For OCT mounted CT26 murine colon tumor tissue sections, sliced samples were fixed  
168 in ice-cold 4% paraformaldehyde, after been incubated with 5% BSA, they were  
169 incubated with CD3-PE, CD8-APC overnight in 4 °C. Following steps were same to  
170 BMDMs on the microscope cover glass.

### 171 **Bioinformatic analysis**

172 Correlation analysis between gene transcriptomes, such as CXCR3 and CCL9, CCR5  
173 and CCL5 in COAD and BRCA patients in TCGA by using TIMER2.0  
174 (<http://timer.cistrome.org/>).

### 175 **Statistical analysis**

176 The results are expressed as the mean  $\pm$  standard error of mean. All data were analyzed  
177 using GraphPad Prism 7.0 (GraphPad Software, USA) by unpaired Student's t test, one-  
178 way or two-way analysis of variance (ANOVA), and log-rank (Mantel-Cox) test.  $p <$   
179  $0.05$  was considered statistically significant (\*  $p < 0.05$ , \*\*  $p < 0.01$ , \*\*\*  $p < 0.001$ ,  
180 \*\*\*\*  $p < 0.0001$ )

181

182 **Supplementary Figures**

183 **Supplementary Figure 1**

184

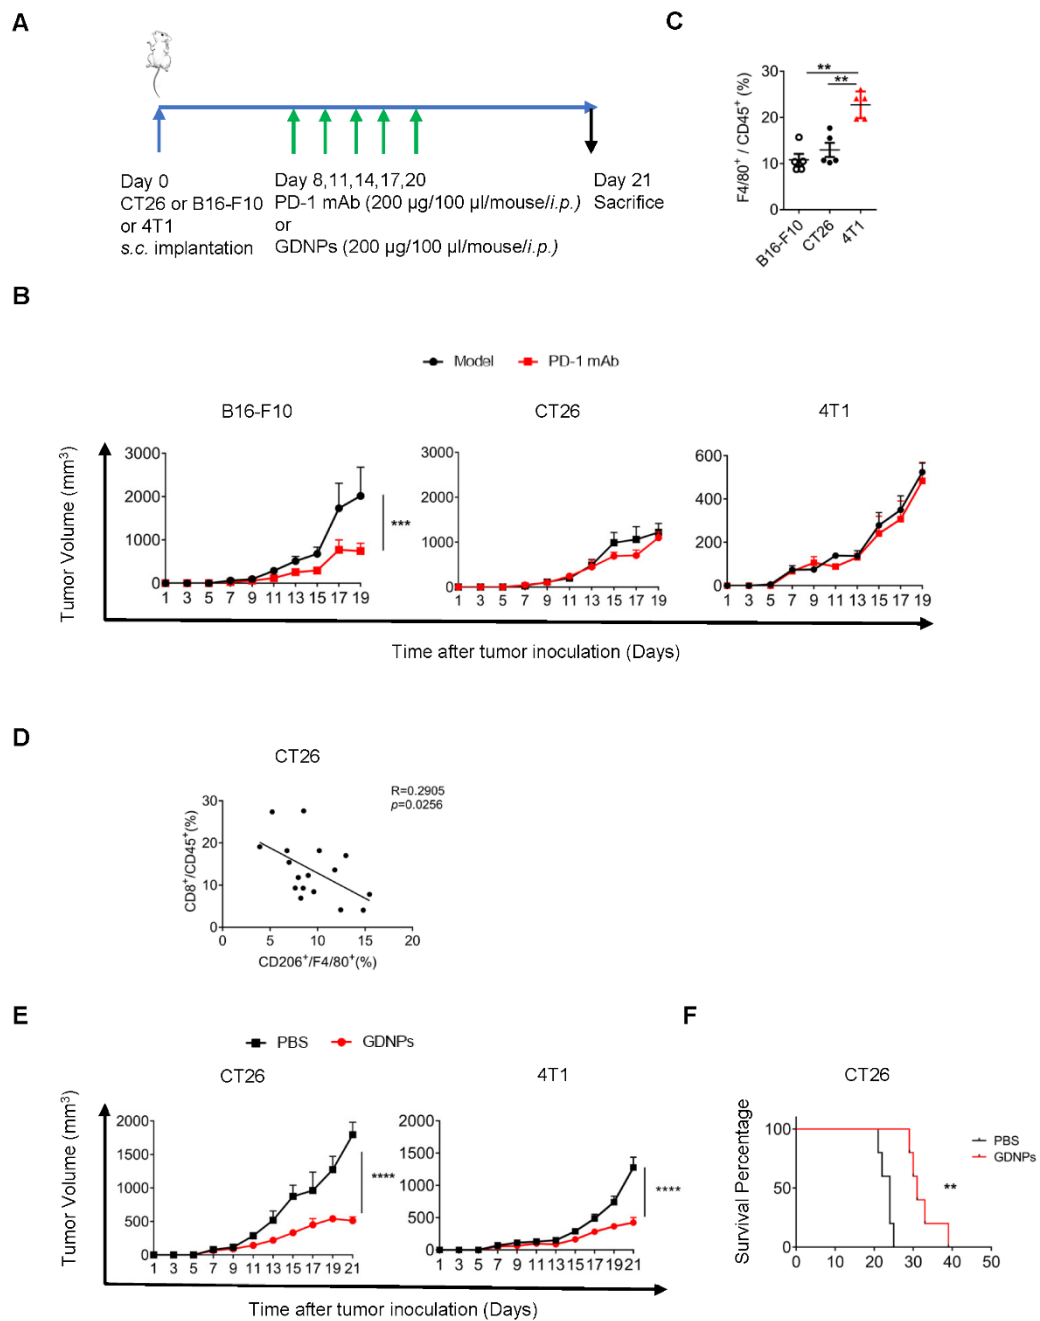

185 **Figure S1. PD-1 mAb and GDNPs independent therapy in three tumor bearing**

186 **mouse models. (A) Schematic of B16-F10 murine melanoma, CT26 murine colon**

187 tumor, 4T1 murine breast tumor three mouse models under GDNPs/PD-1 Ab/Vehicle  
188 treatment regimen assay. (B) Tumor volume of B16-F10, CT26, 4T1 three murine  
189 tumor models under PD-1 mAb/Vehicle treatment. ( $n = 5$  for each group,  $**p < 0.01$ )  
190 (C) Ratio of F4/80<sup>+</sup>/CD45<sup>+</sup> in tumor immune microenvironment for B16-F10 melanoma,  
191 4T1 breast cancer, CT26 colon cancer three murine tumor models ( $n = 5$  for each group,  
192  $***p < 0.001$ ). (D) Correlation analyses between ratio of CD8<sup>+</sup>/CD45<sup>+</sup> and  
193 CD206<sup>+</sup>/F4/80<sup>+</sup> for CT26 murine colon tumor model under GDNPs/Vehicle treatment.  
194 (for CT26 murine colon tumor model:  $n = 17$ ,  $p = 0.0256$ ,  $R = 0.2905$ ) (E) Tumor  
195 volume of CT26 murine colon cancer, 4T1 murine breast cancer two murine models  
196 under GDNPs/PBS treatment. ( $n = 4$  for each group,  $****p < 0.0001$ ) (F) Survival curve  
197 of mice treated with GDNPs or Vehicle controls. ( $n = 5$  for each group,  $**p < 0.01$ )  
198 Data are presented as mean  $\pm$  SEM and analyzed using student t test, Two-way ANOVA  
199 and Mantel-Cox test.

200

201

202 **Supplementary Figure 2**

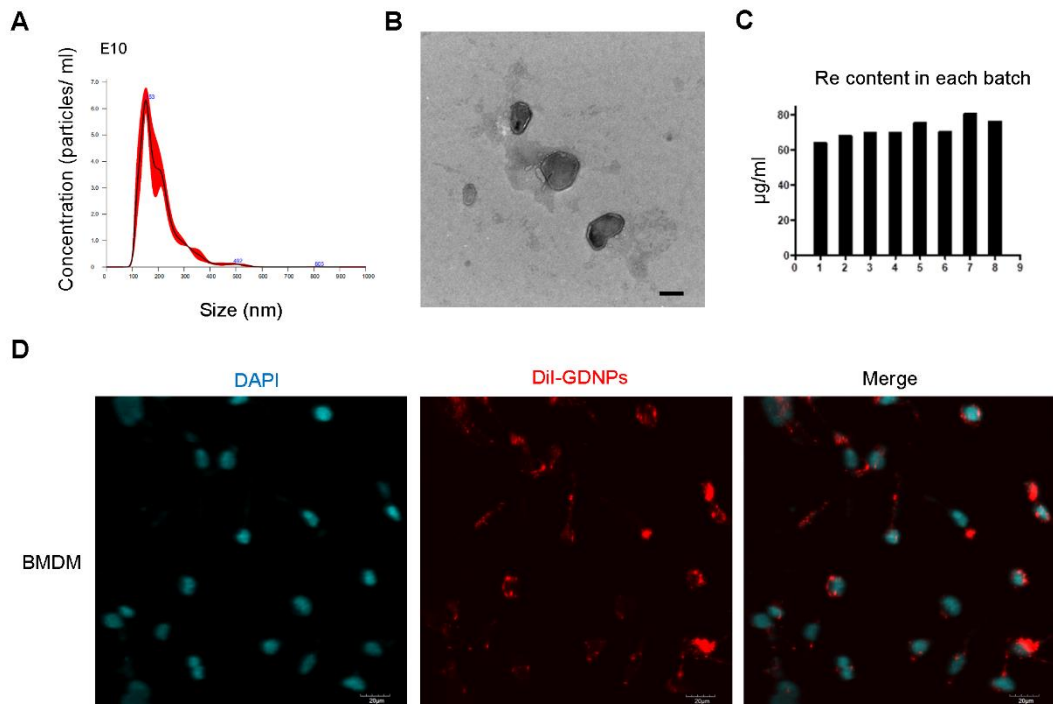

203

204 **Figure S2. Characterization of ginseng-derived nanoparticles (GDNPs) prepared**

205 **from fresh ginseng roots.** (A) GDNPs were characterized by nanoparticle tracking

206 system (NTA). (B) GDNPs from sucrose density gradient (45%) were characterized by

207 transmission electron microscopy (TEM) (Scale bar = 200 nm). (C) Re ginsenoside

208 content in each batch of GDNPs performed by HPLC-MS. (D) Immunofluorescent

209 images for DiI-labelled GDNPs cocultured with BMDM (10 µg/ml). BMDMs were

210 incubated with DiI-labelled GDNPs for 12 h. (scale bar = 20 µm)

211

212

213 **Supplementary Figure 3**

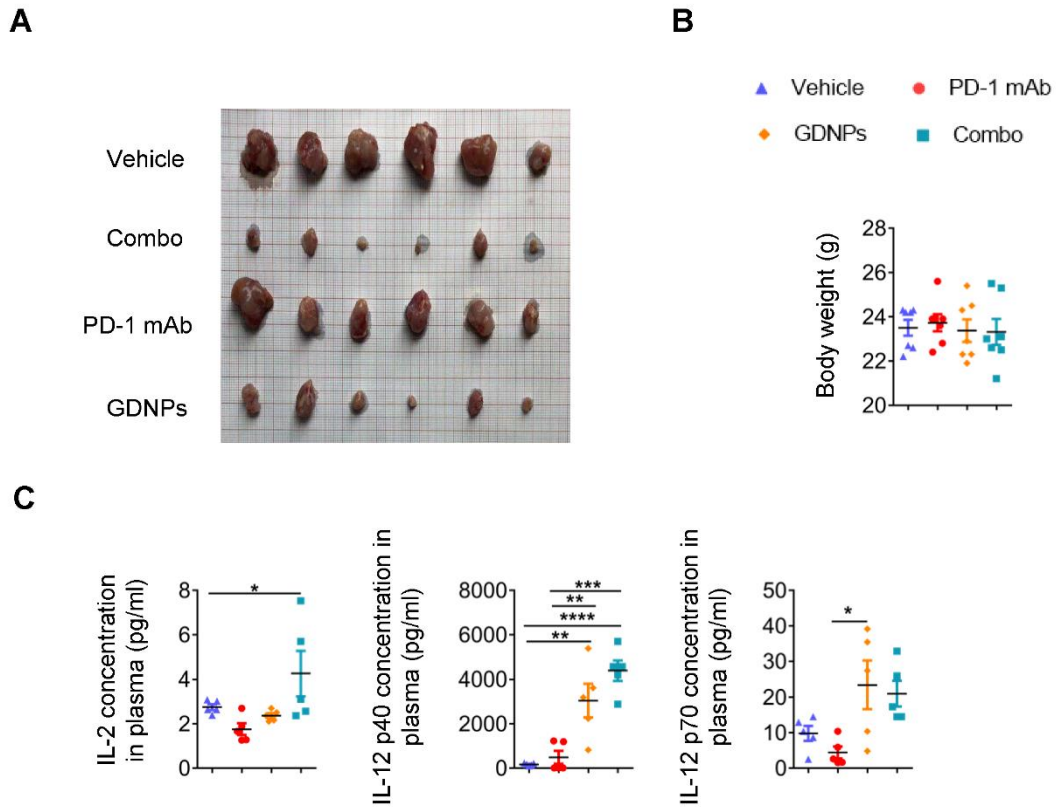

214

215 **Figure S3. GDNPs combined with PD-1 mAb depresses CT26 murine colon tumor**  
 216 **progression.** (A) Tumor pictures for Vehicle, PD-1 mAb, GDNPs, Combo treatment (*n*  
 217 = 6 for each group). (B) Body weight of CT26 tumor bearing mice under Vehicle, PD-1  
 218 mAb, GDNPs, and Combo treatment on day 21 before sacrifice. (*n* = 7 for each group)  
 219 (C) IL-2, IL-12 p40, IL-12 p70 concentration in mice plasma by Milliplex Luminex  
 220 assay. (*n* = 5 for each group, \**p* < 0.05, \*\**p* < 0.01, \*\*\**p* < 0.001, \*\*\*\**p* < 0.0001). Data  
 221 are presented as mean ± SEM and analyzed using One-way ANOVA.

222

223

224 **Supplementary Figure 4**

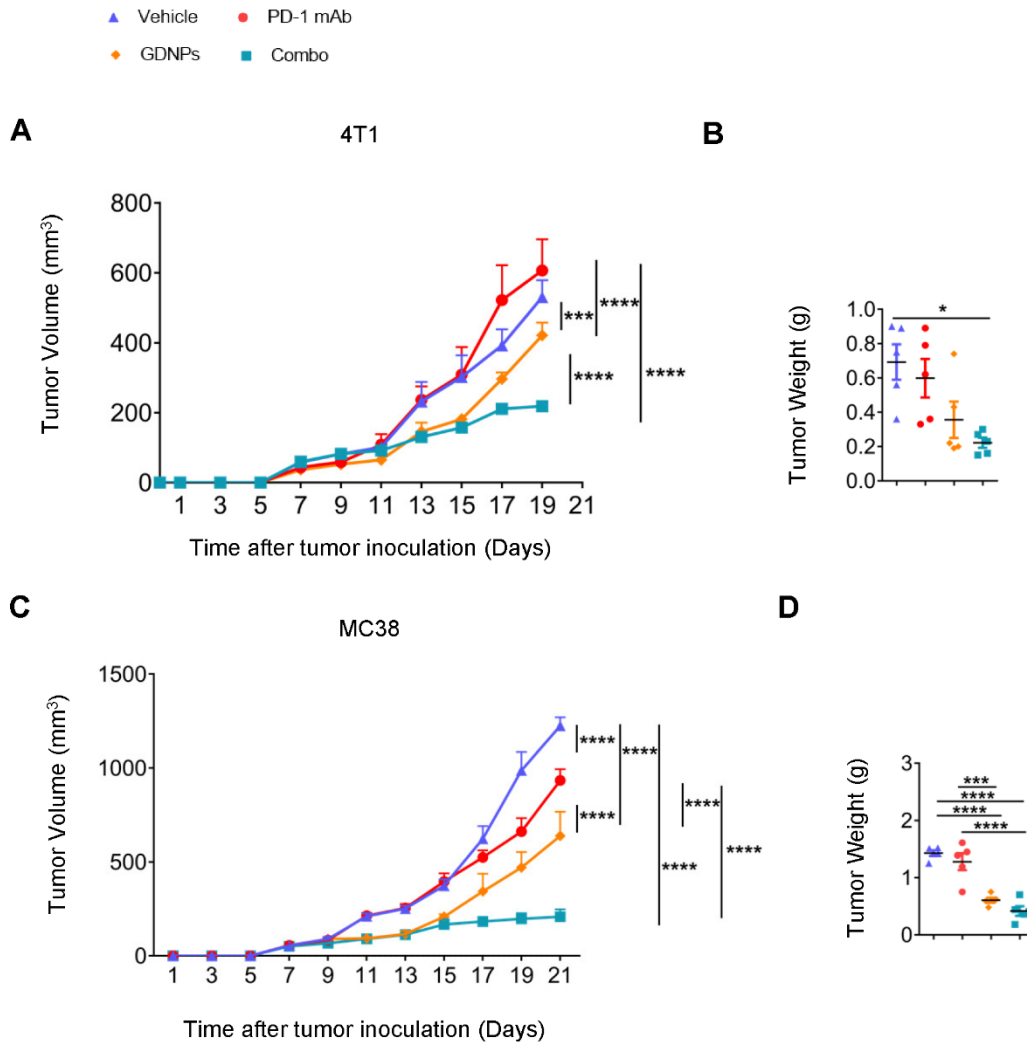

225

226 **Figure S4. GDNPs combined with PD-1 mAb depresses 4T1 and MC38 murine**  
 227 **tumor progression.** (A) Tumor volume and (B) Day 21 Tumor weight for 4T1 murine  
 228 breast cancer mouse model (n = 5 for each group, \*p < 0.05, \*\*\*\*p < 0.0001). (C)  
 229 Tumor volume and (D) Day 21 Tumor weight for MC38 murine colon tumor model (n  
 230 = 5 for each group, \*\*\*\*p < 0.0001). Data are presented as mean ± SEM. Analyzed by  
 231 One-way ANOVA or Two-way ANOVA.

232

233

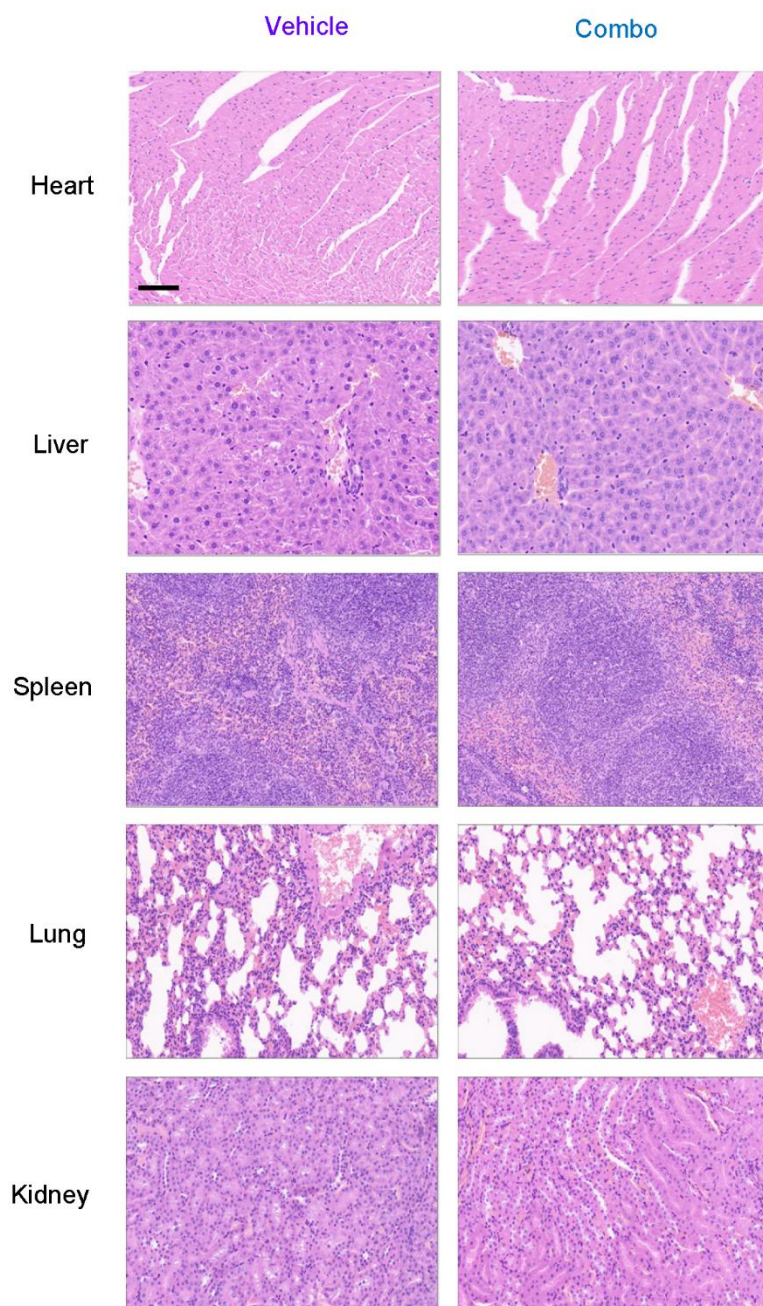

235

236 **Figure S5. Safety evaluation assay.** Analyses of microscopic pathological changes in  
237 murine main organs. Representative picture for HE staining for heart, liver, spleen, lung,  
238 kidney in Vehicle or Combo treatment group. (Scale bar = 50  $\mu$ m).

239

240



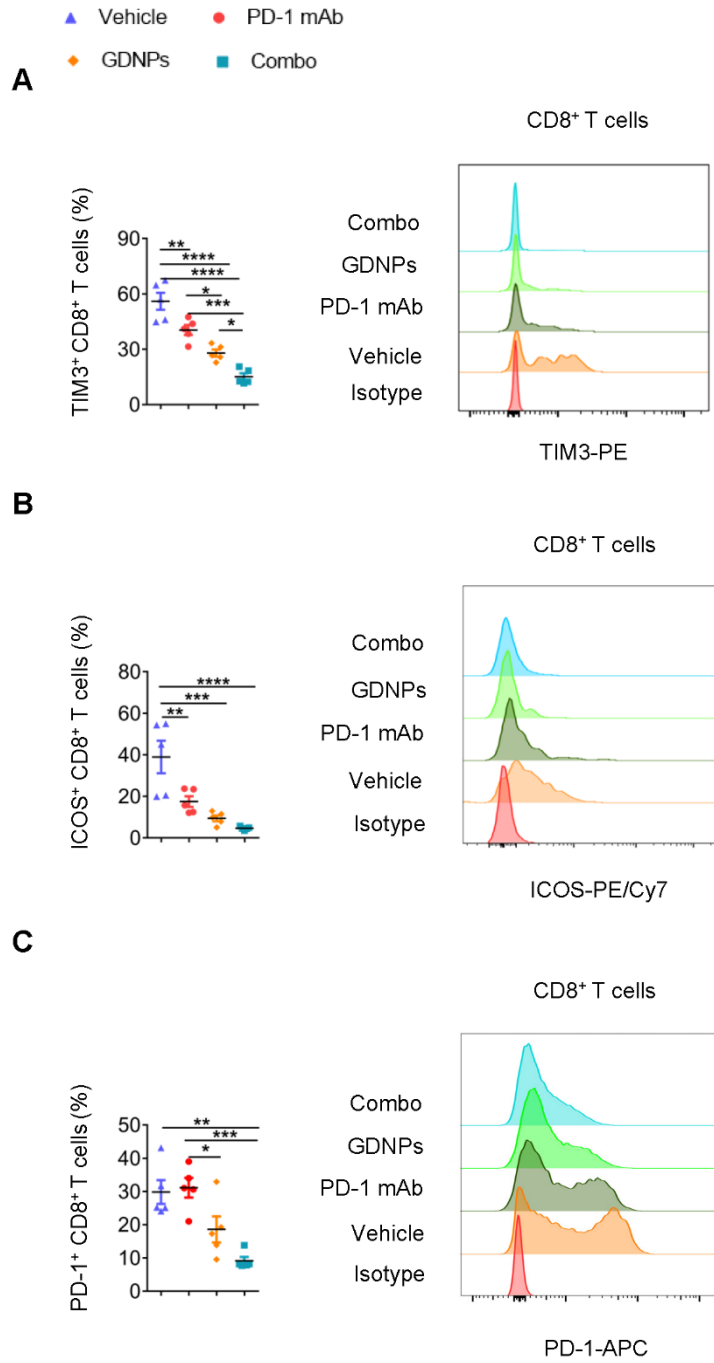

242

243 **Figure S6. GDNPs combined with PD-1 mAb decreases immune checkpoint**  
 244 **expression in T cell in CT26 murine colon tumor bearing mice. Fractions of (A)**  
 245 **TIM3<sup>+</sup>, (B) ICOS<sup>+</sup>, (C) PD-1<sup>+</sup> in CD8<sup>+</sup> T cells and the representative flowcytometry**

246 pictures in Vehicle, PD-1 mAb, GDNPs, and Combo groups. Data are presented as

247 mean  $\pm$  SEM. n = 5 for each group, \*p < 0.05, \*\*p < 0.01, \*\*\*p < 0.001, \*\*\*\*p < 0.0001.

248 Analyzed by One-way ANOVA.

249

250

251 **Supplementary Figure 7**

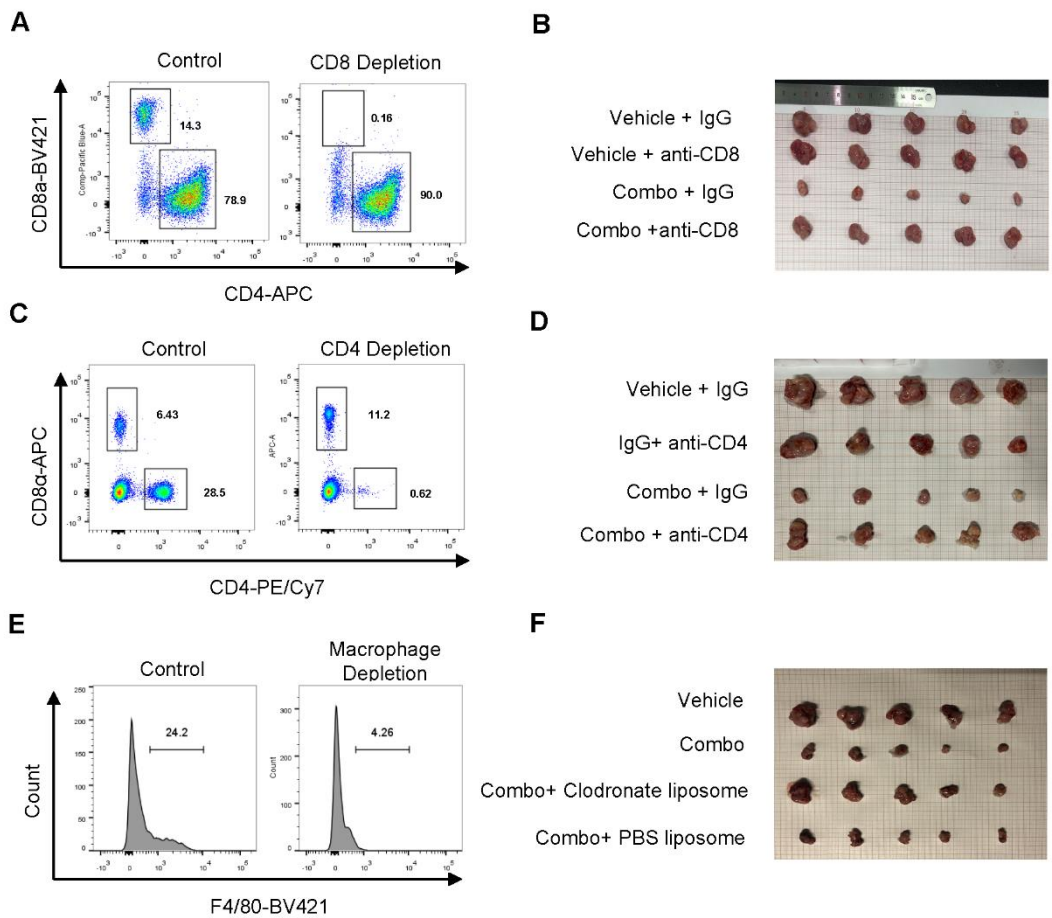

252

253 **Figure S7. CD4<sup>+</sup>, CD8<sup>+</sup> and macrophage *in vivo* depletion in CT26 murine colon**  
 254 **tumor bearing mice.** (A) Representative flow cytometric picture for CD8<sup>+</sup> T cell  
 255 depletion verification in peripheral blood. (B) Tumor pictures for Vehicle + IgG, Combo  
 256 + IgG, Vehicle + anti-CD8, Combo + anti-CD8. (C) Representative flow cytometric  
 257 picture for CD4<sup>+</sup> T cell depletion verification in peripheral blood. (D) Tumor pictures  
 258 for Vehicle + IgG, Combo + IgG, Vehicle + anti-CD4, Combo + anti-CD4. (E)  
 259 Representative flow cytometric picture for macrophage depletion verification in  
 260 peripheral blood. (F) Tumor pictures for Vehicle, Combo, Combo + Clodronate  
 261 liposome, Combo + PBS liposome.

262

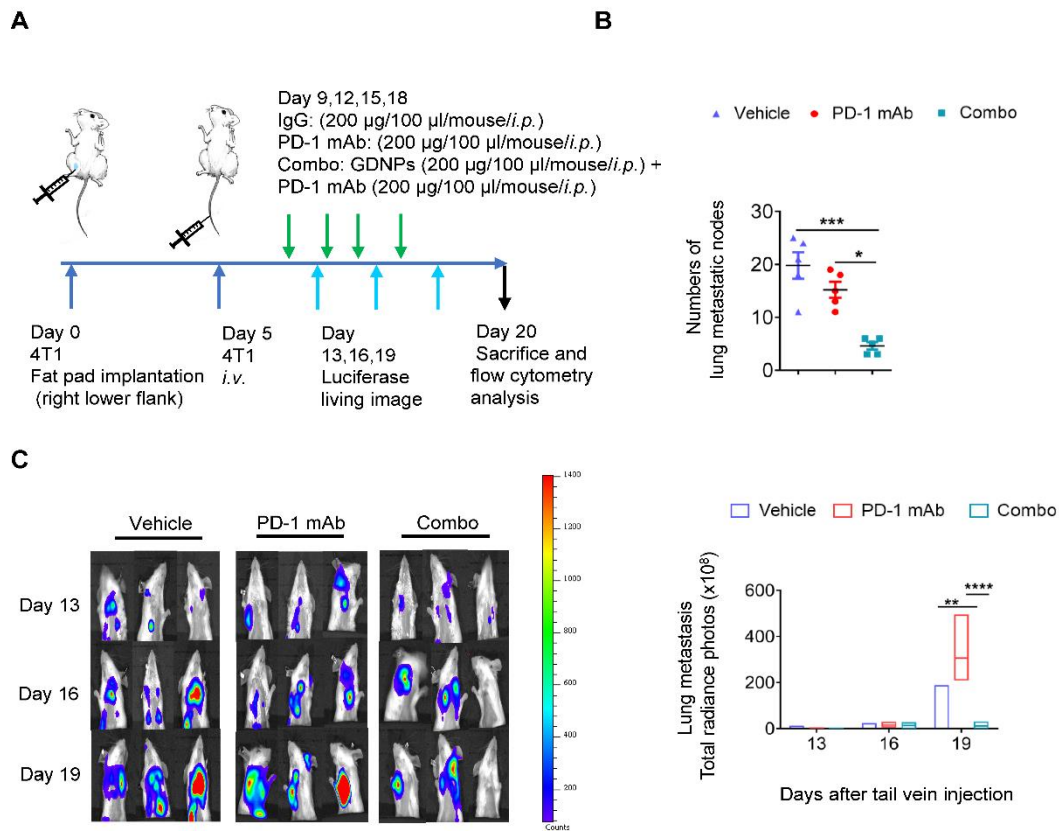

264

265 **Figure S8. GDNPs combined with PD-1 mAb effectively inhibits 4T1 murine**

266 **breast cancer lung metastasis. (A) Schematic diagram and administration methods for**

267 **4T1 murine breast cancer lung metastasis. (B) Quantification of 4T1 murine lung**

268 **metastatic nodes in Vehicle, PD-1 mAb, and Combo groups (n = 5 per group, \*p < 0.05,**

269 **\*\*\*p < 0.001). (C) Luciferase bioluminescent images of 4T1-Luc murine breast cancer**

270 **lung metastasis in Vehicle, PD-1 mAb, and Combo groups. Results were calculated**

271 **from three independent experiments. (n = 3 per group, \*\*p < 0.01, \*\*\*\*p < 0.0001)**

272 **Data are presented as mean ± SEM. Analyzed by One-way ANOVA.**

273

274

275 **Supplementary Figure 9**

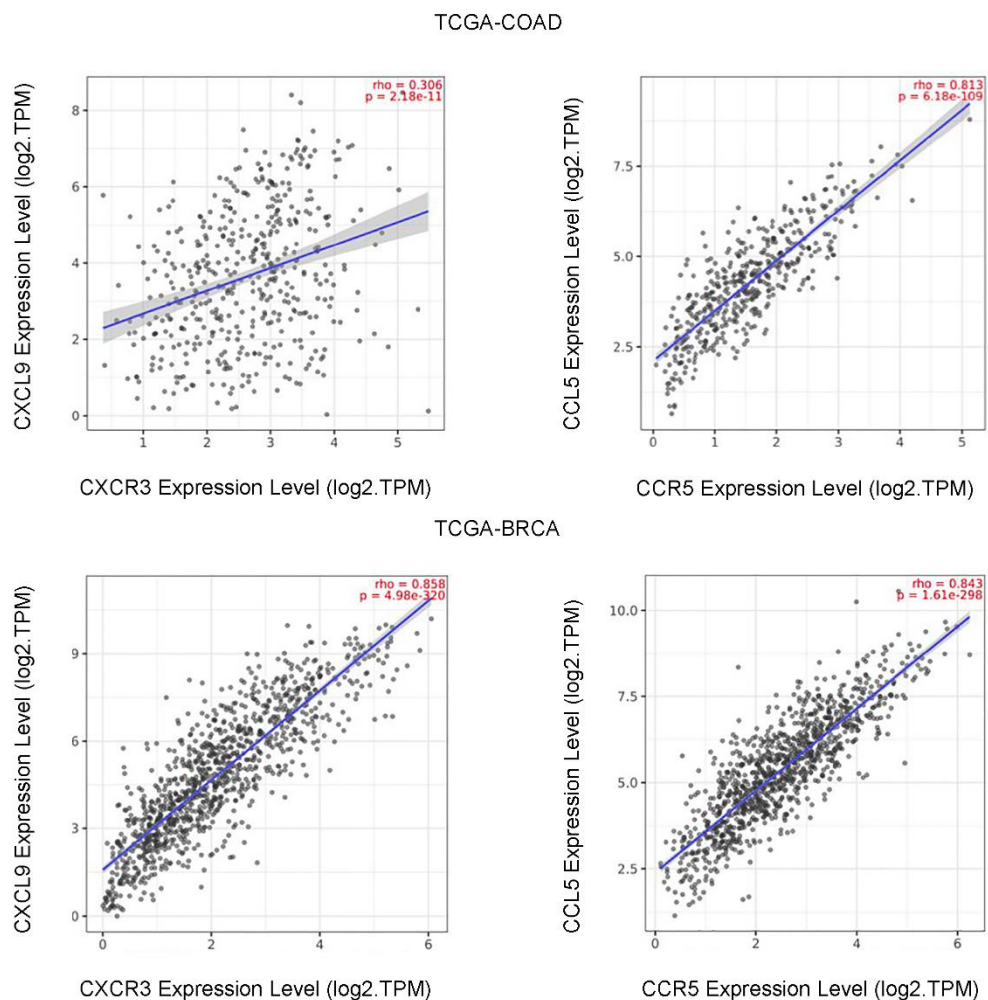

276

277 **Figure S9. Correlation analyses between gene transcriptomes, such as CXCR3 and**

278 **CCL9, CCR5 and CCL5 in COAD and BRCA patients in TCGA by using**

279 **TIMER2.0 (<http://timer.cistrome.org/>).**

280

281

282 **Supplementary Figure 10**

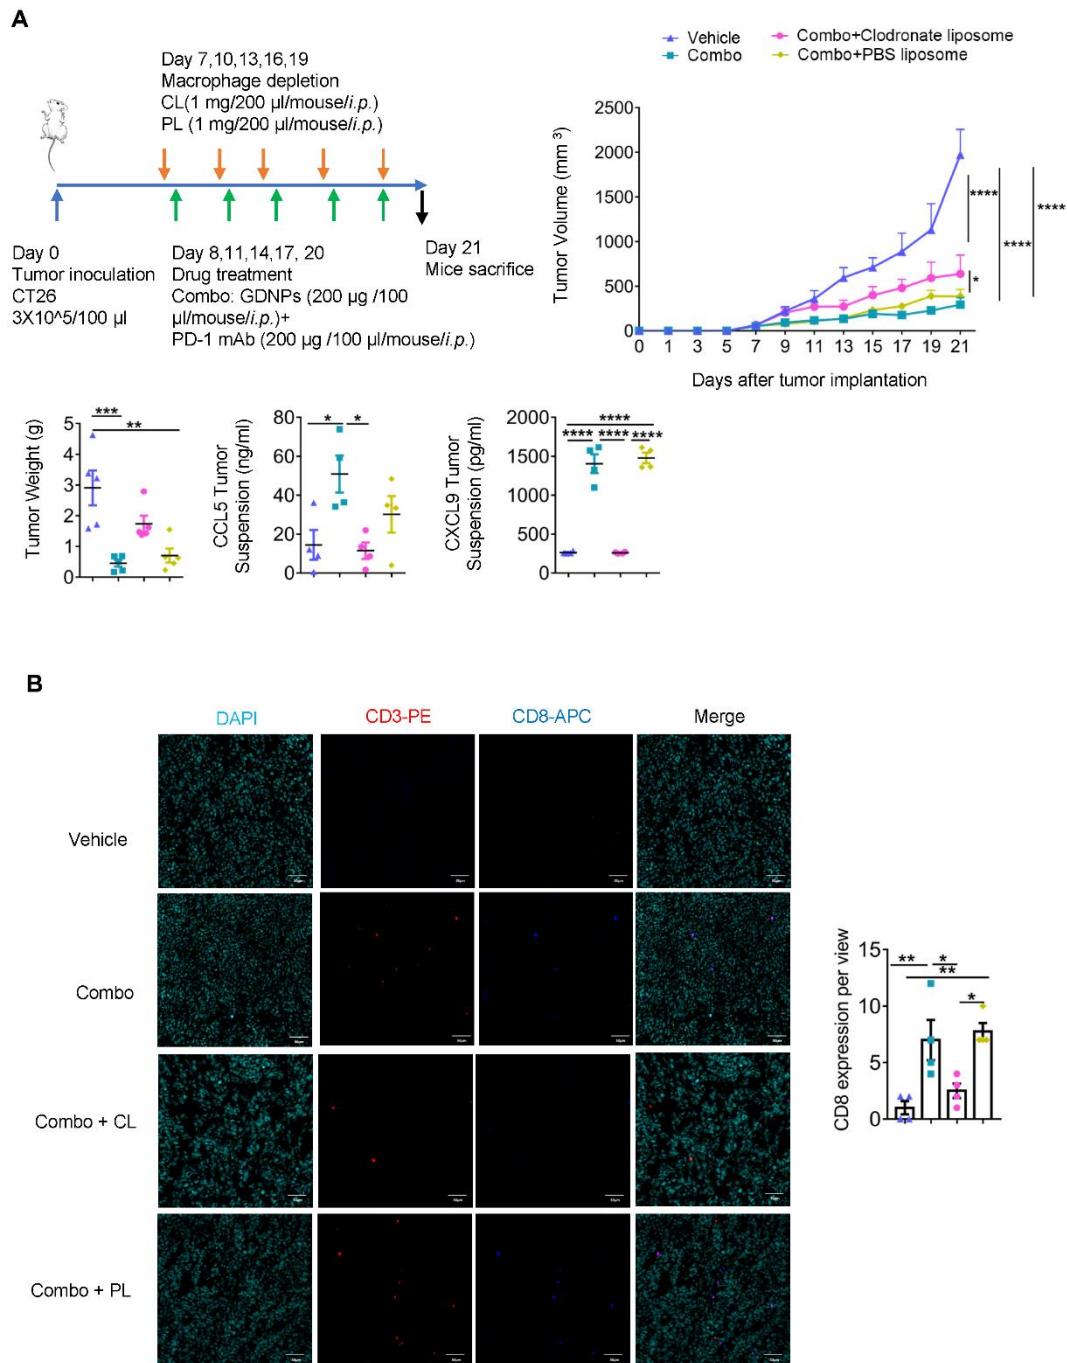

283

284 **Figure S10. GDNPs activated macrophage recruited CD8<sup>+</sup> T lymphocytes into**  
 285 **TME in CT26 murine colon tumor model. (A) Paradigm of tumor implantation,**  
 286 **macrophage depletion assay by clodronate liposome (CL) or negative control PBS**  
 287 **liposome (PL), drug treatment time schedule in CT26 murine colon tumor model.**

288 Tumor volume and tumor weight for Combo, Combo + CL, Combo + PL, Vehicle four  
289 groups. CXCL9 and CCL5 concentration in tumor suspension in the four groups (n = 5  
290 per group, \*p < 0.05, \*\*p < 0.01, \*\*\*p < 0.001, \*\*\*\*p < 0.0001). (B)  
291 Immunofluorescent staining of tumor sections in Combo, Combo + CL, Combo + PL,  
292 Vehicle groups (n = 4 per group, \*p < 0.05, \*\*p < 0.01). Data are presented as mean ±  
293 SEM. Analyzed by One-way ANOVA and Two-way ANOVA.

294

295

296 **Supplementary Figure 11**

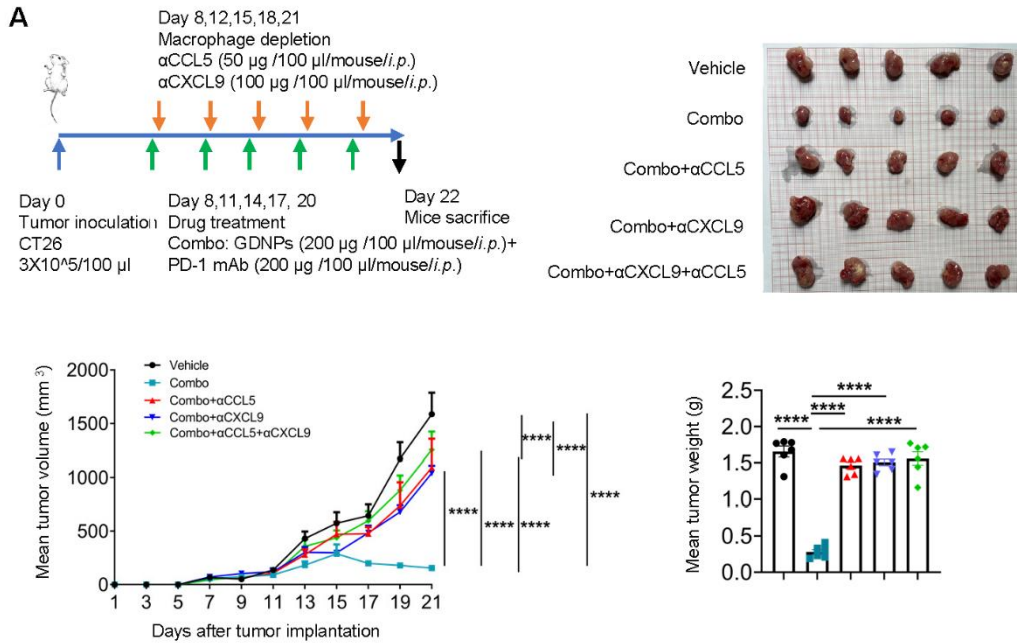

297

298 **Figure S11. CCL5 and CXCL9 neutronization in CT26 murine colon model. (A)**

299 The time schedule, tumor picture, mean tumor volumes and tumor weight for

300 chemokines *in vivo* neutralization assay (n = 5~6, Two-way ANOVA or One-way

301 ANOVA).

302

303

304



305 **Supplementary Figure 12**

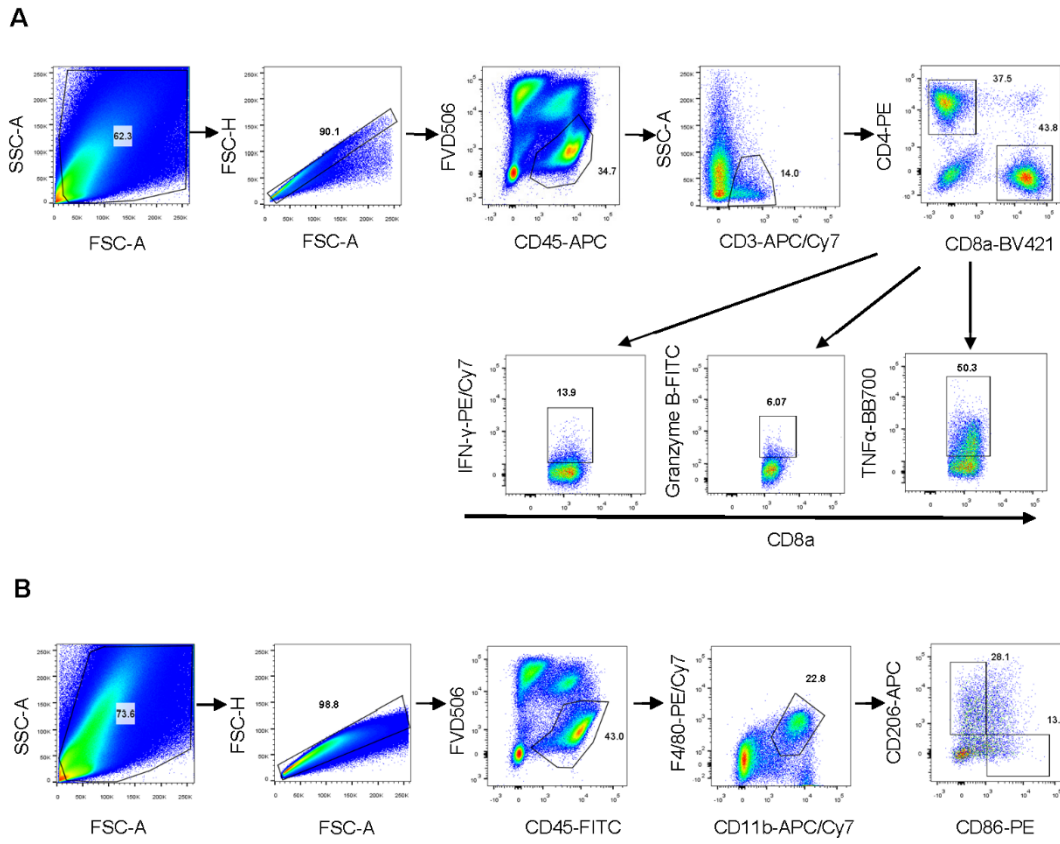

306

307 **Figure S12. Flow cytometry gating strategy for tumor infiltrated (A)T lymphocytes**

308 and (B) macrophage polarization.

309

310
